# Supplementary material for: Structural, mechanical, spectroscopic and thermodynamic characterization of the copper-uranyl tetrahydroxide mineral vandenbrandeite
Source: Royal Society of Chemistry journal article supplement (doi:10.1039/c9ra09047a), 2019-01-01

SUPPLEMENTARY INFORMATION

**Structural, Mechanical, Spectroscopic and Thermodynamic  
Characterization of the Copper-Uranyl Tetrahydroxide  
Mineral Vandenbrandeite**

Francisco Colmenero,<sup>a\*</sup> Jakub Plášil,<sup>b</sup> Joaquín Cobos,<sup>c</sup> Jiří Sejkora,<sup>d</sup> Vicente Timón,<sup>a</sup>

Jiří Čejka,<sup>d</sup> Ana María Fernández,<sup>c</sup> Václav Petříček<sup>b</sup>

<sup>a</sup>*Instituto de Estructura de la Materia (IEM-CSIC). C/ Serrano, 113. 28006 – Madrid, Spain.*

<sup>b</sup>*Institute of Physics ASCR, v.v.i., Na Slovance 2, 182 21, Praha 8, Czech Republic.*

<sup>c</sup>*Centro de Investigaciones Energéticas, Medioambientales y Tecnológicas (CIEMAT). Avda/  
Complutense, 40. 28040 – Madrid, Spain*

<sup>d</sup>*Mineralogicko-petrologické oddělení, Národní muzeum, Cirkusová 1740, 193 00 Praha 9, Czech  
Republic.*

**Table S.1.** Interatomic distances in vandenbrandeite (in Å). The experimental and theoretical values correspond to room temperature and 0 K, respectively.

| Bond                            | Exp. [this work] | Calc. |
|---------------------------------|------------------|-------|
| <b>U-O</b>                      |                  |       |
| U-O3                            | 1.786(3)         | 1.806 |
| U-O4                            | 1.801(3)         | 1.819 |
| U-O8                            | 2.314(3)         | 2.273 |
| U-O7                            | 2.335(3)         | 2.338 |
| U-O7#                           | 2.403(2)         | 2.417 |
| U-O5                            | 2.417(2)         | 2.410 |
| U-O6                            | 2.454(2)         | 2.480 |
| <U-Oeq>                         | 2.38             | 2.38  |
| <b>CuO</b>                      |                  |       |
| Cu-O8                           | 1.886(3)         | 1.930 |
| Cu-O5                           | 1.956(3)         | 1.999 |
| Cu-O6                           | 1.972(3)         | 2.030 |
| Cu-O6#                          | 1.978(3)         | 2.036 |
| Cu-O4                           | 2.591(3)         | 2.667 |
| Cu-O3                           | 3.100(3)         | 3.132 |
| <Cu1-O>                         | 2.25             | 2.30  |
| <b>OH</b>                       |                  |       |
| O5-H10                          | 0.93(3)          | 0.994 |
| O6-H12                          | 0.94(3)          | 1.017 |
| O7-H9                           | 0.93(2)          | 0.985 |
| O8-H11                          | 0.937(15)        | 0.983 |
| <b>Hydrogen bonds (O-H...O)</b> |                  |       |
| O5...O7                         | 2.825(4)         | 2.771 |
| H10...O7                        | 1.91(4)          | 1.794 |
| O6...O5                         | 2.664(4)         | 2.651 |
| H12...O5                        | 1.73(3)          | 1.644 |
| O7...O3                         | 2.841(4)         | 2.792 |
| H9...O3                         | 1.92(2)          | 1.823 |
| O8...O4                         | 2.927(4)         | 2.774 |
| H11...O4                        | 2.11(3)          | 1.801 |

**Table S.2.** Interatomic angles in vandenbrandeite (in degrees). The experimental and theoretical values correspond to room temperature and 0 K, respectively.

| Angle                           | Exp. [this work] | Calc.  |
|---------------------------------|------------------|--------|
| <b>O-U-O</b>                    |                  |        |
| O3-U-O4                         | 176.15           | 176.80 |
| O3-U-O8                         | 87.26            | 86.77  |
| O3-U-O7                         | 90.08            | 90.28  |
| O3-U-O7#                        | 93.99            | 94.57  |
| O3-U-O5                         | 85.54            | 86.55  |
| O3-U-O6                         | 88.96            | 90.51  |
| O4-U-O8                         | 94.63            | 95.45  |
| O4-U-O7                         | 90.51            | 89.38  |
| O4-U-O7#                        | 89.77            | 88.29  |
| O4-U-O5                         | 90.86            | 90.26  |
| O4-U-O6                         | 88.30            | 90.26  |
| <b>O-Cu-O</b>                   |                  |        |
| O8-Cu-O5                        | 96.34            | 100.14 |
| O8-Cu-O6                        | 174.98           | 175.00 |
| O8-Cu-O6#                       | 95.66            | 98.17  |
| O8-Cu-O4                        | 88.76            | 87.48  |
| O8-Cu-O3                        | 107.03           | 108.84 |
| O5-Cu-O6                        | 84.25            | 83.58  |
| O5-Cu-O6#                       | 162.18           | 156.97 |
| O5-Cu-O4                        | 92.70            | 94.55  |
| O5-Cu-O3                        | 65.25            | 65.18  |
| O6-Cu-O6#                       | 82.67            | 77.43  |
| O6-Cu-O4                        | 96.20            | 95.59  |
| <b>Hydrogen bonds (O-H...O)</b> |                  |        |
| O5-H10...O7                     | 166.84           | 166.77 |
| O6-H12...O5                     | 172.41           | 169.78 |
| O7-H9...O3                      | 170.30           | 166.80 |
| O8-H11...O4                     | 145.20           | 169.72 |

**Figure. S.1.** Frontier band functions in vandenbrandeite: (A) Highest occupied band function: (B) Lowest unoccupied band function. Color code: U-Blue, Cu-Orange-pink, O-Red, H-White.

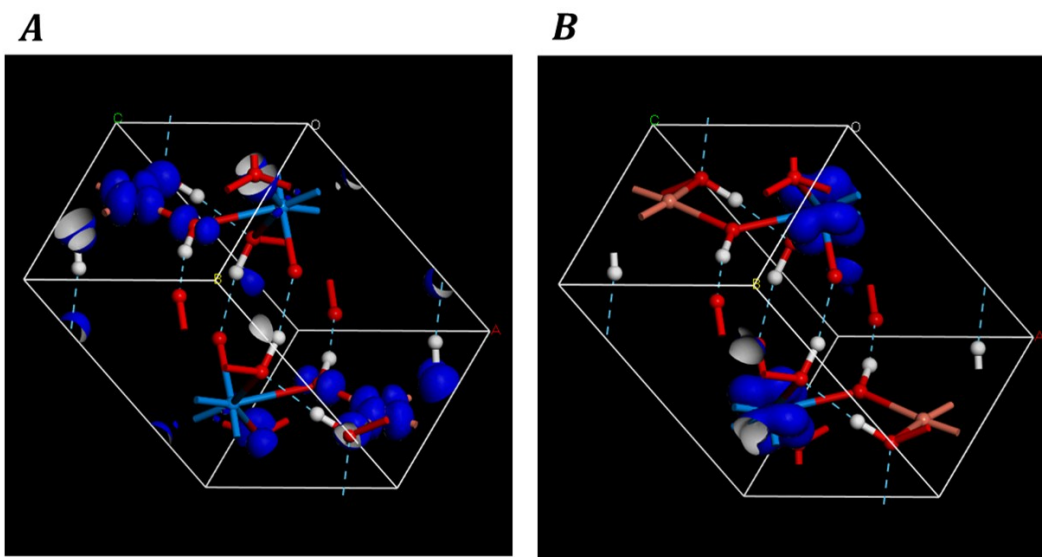

**Table S.3.** Computed elastic constants of vandenbrandeite. All the values are given in GPa.

| <i>ij</i> | <i>C<sub>ij</sub></i> |
|-----------|-----------------------|
| 11        | 62.32                 |
| 22        | 85.75                 |
| 33        | 80.00                 |
| 44        | 20.62                 |
| 55        | 25.08                 |
| 66        | 28.50                 |
| 12        | 25.67                 |
| 13        | 24.88                 |
| 14        | -0.69                 |
| 15        | 4.03                  |
| 16        | -14.88                |
| 23        | 20.25                 |
| 24        | -6.71                 |
| 25        | 1.49                  |
| 26        | -5.92                 |
| 34        | 1.20                  |
| 35        | -4.02                 |
| 36        | -5.53                 |
| 45        | -6.57                 |
| 46        | -2.02                 |
| 56        | 1.34                  |

**Figure S.2.** Calculated phonon density of states of vandenbrandeite.

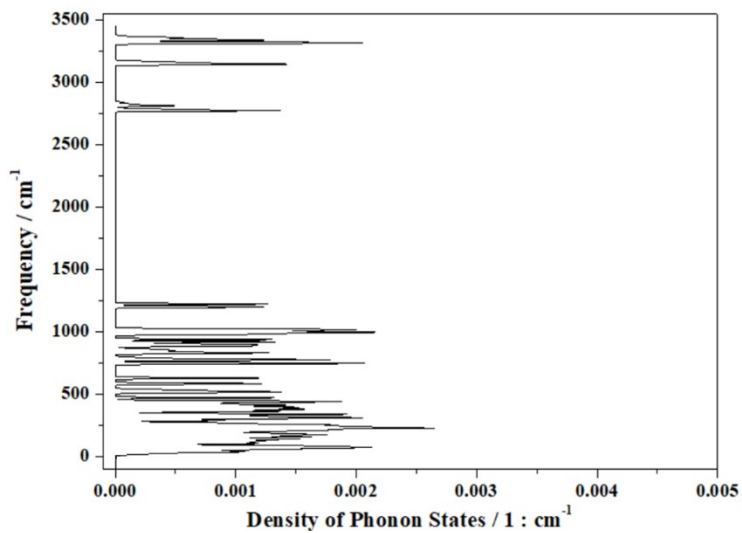

**Figure S.3.** Unit cell volume of vandenbrandeite as a function of the applied external pressure.

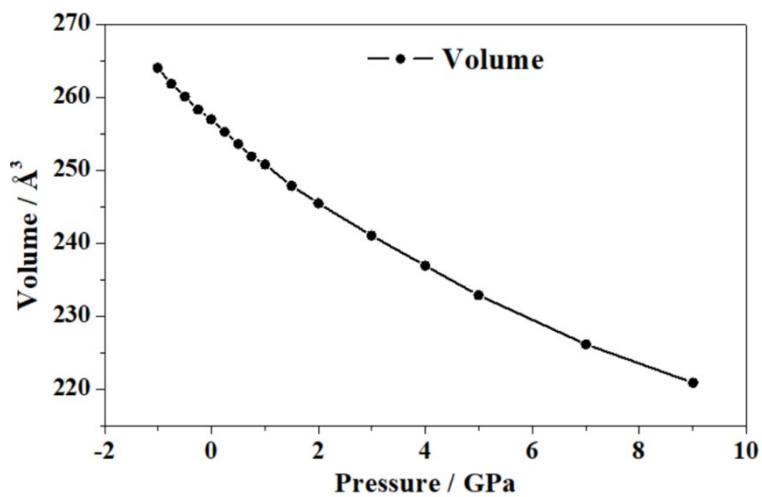

**Table S.4.** Calculated isobaric heat capacity function,  $C_p$ , of vandenbrandeite. Temperature and heat capacity values are given in K and  $J \cdot K^{-1} \cdot mol^{-1}$  units, respectively.

| T   | $C_p$    | T   | $C_p$    | T    | $C_p$    |
|-----|----------|-----|----------|------|----------|
| 10  | 1.3517   | 350 | 194.0970 | 690  | 241.5597 |
| 20  | 7.6831   | 360 | 196.5251 | 700  | 242.3337 |
| 30  | 16.2246  | 370 | 198.8549 | 710  | 243.0901 |
| 40  | 25.2779  | 380 | 201.0905 | 720  | 243.8295 |
| 50  | 34.5997  | 390 | 203.2361 | 730  | 244.5527 |
| 60  | 44.0545  | 400 | 205.2960 | 740  | 245.2605 |
| 70  | 53.4669  | 410 | 207.2738 | 750  | 245.9534 |
| 80  | 62.6764  | 420 | 209.1736 | 760  | 246.6320 |
| 90  | 71.5610  | 430 | 210.9990 | 770  | 247.2970 |
| 100 | 80.0397  | 440 | 212.7537 | 780  | 247.9487 |
| 110 | 88.0693  | 450 | 214.4411 | 790  | 248.5879 |
| 120 | 95.6370  | 460 | 216.0645 | 800  | 249.2148 |
| 130 | 102.7521 | 470 | 217.6272 | 810  | 249.8300 |
| 140 | 109.4387 | 480 | 219.1323 | 820  | 250.4339 |
| 150 | 115.7289 | 490 | 220.5826 | 830  | 251.0268 |
| 160 | 121.6576 | 500 | 221.9811 | 840  | 251.6092 |
| 170 | 127.2591 | 510 | 223.3304 | 850  | 252.1813 |
| 180 | 132.5654 | 520 | 224.6329 | 860  | 252.7435 |
| 190 | 137.6048 | 530 | 225.8913 | 870  | 253.2961 |
| 200 | 142.4017 | 540 | 227.1078 | 880  | 253.8393 |
| 210 | 146.9770 | 550 | 228.2845 | 890  | 254.3736 |
| 220 | 151.3481 | 560 | 229.4235 | 900  | 254.8990 |
| 230 | 155.5296 | 570 | 230.5268 | 910  | 255.4159 |
| 240 | 159.5337 | 580 | 231.5963 | 920  | 255.9245 |
| 250 | 163.3706 | 590 | 232.6337 | 930  | 256.4250 |
| 260 | 167.0492 | 600 | 233.6406 | 940  | 256.9176 |
| 270 | 170.5772 | 610 | 234.6186 | 950  | 257.4025 |
| 280 | 173.9615 | 620 | 235.5691 | 960  | 257.8799 |
| 290 | 177.2081 | 630 | 236.4935 | 970  | 258.3500 |
| 300 | 180.3229 | 640 | 237.3932 | 980  | 258.8130 |
| 310 | 183.3110 | 650 | 238.2693 | 990  | 259.2689 |
| 320 | 186.1777 | 660 | 239.1229 | 1000 | 259.7180 |
| 330 | 188.9278 | 670 | 239.9552 | -    | -        |
| 340 | 191.5660 | 680 | 240.7672 | -    | -        |

**Table S.5.** Calculated entropy function,  $S$ , of vandenbrandeite. Temperature and entropy values are given in K and  $J \cdot K^{-1} \cdot mol^{-1}$  units, respectively.

| T   | S        | T   | S        | T    | S        |
|-----|----------|-----|----------|------|----------|
| 10  | 0.4009   | 350 | 229.5601 | 690  | 378.7338 |
| 20  | 3.0505   | 360 | 235.0622 | 700  | 382.2151 |
| 30  | 7.7512   | 370 | 240.4788 | 710  | 385.6579 |
| 40  | 13.6510  | 380 | 245.8118 | 720  | 389.0630 |
| 50  | 20.2890  | 390 | 251.0632 | 730  | 392.4312 |
| 60  | 27.4323  | 400 | 256.2348 | 740  | 395.7633 |
| 70  | 34.9318  | 410 | 261.3286 | 750  | 399.0601 |
| 80  | 42.6755  | 420 | 266.3463 | 760  | 402.3223 |
| 90  | 50.5744  | 430 | 271.2898 | 770  | 405.5507 |
| 100 | 58.5567  | 440 | 276.1608 | 780  | 408.7459 |
| 110 | 66.5655  | 450 | 280.9610 | 790  | 411.9086 |
| 120 | 74.5564  | 460 | 285.6921 | 800  | 415.0394 |
| 130 | 82.4953  | 470 | 290.3556 | 810  | 418.1391 |
| 140 | 90.3573  | 480 | 294.9533 | 820  | 421.2083 |
| 150 | 98.1245  | 490 | 299.4867 | 830  | 424.2475 |
| 160 | 105.7846 | 500 | 303.9572 | 840  | 427.2573 |
| 170 | 113.3296 | 510 | 308.3664 | 850  | 430.2384 |
| 180 | 120.7551 | 520 | 312.7157 | 860  | 433.1912 |
| 190 | 128.0587 | 530 | 317.0066 | 870  | 436.1163 |
| 200 | 135.2399 | 540 | 321.2404 | 880  | 439.0142 |
| 210 | 142.2992 | 550 | 325.4184 | 890  | 441.8855 |
| 220 | 149.2383 | 560 | 329.5421 | 900  | 444.7307 |
| 230 | 156.0589 | 570 | 333.6125 | 910  | 447.5501 |
| 240 | 162.7634 | 580 | 337.6311 | 920  | 450.3444 |
| 250 | 169.3542 | 590 | 341.5990 | 930  | 453.1138 |
| 260 | 175.8339 | 600 | 345.5174 | 940  | 455.8590 |
| 270 | 182.2050 | 610 | 349.3874 | 950  | 458.5803 |
| 280 | 188.4701 | 620 | 353.2102 | 960  | 461.2782 |
| 290 | 194.6316 | 630 | 356.9868 | 970  | 463.9529 |
| 300 | 200.6921 | 640 | 360.7183 | 980  | 466.6051 |
| 310 | 206.6539 | 650 | 364.4056 | 990  | 469.2350 |
| 320 | 212.5194 | 660 | 368.0499 | 1000 | 471.8430 |
| 330 | 218.2908 | 670 | 371.6521 | -    | -        |
| 340 | 223.9703 | 680 | 375.2131 | -    | -        |



**Table S.6.** Calculated enthalpy function,  $\Delta H$  ( $\Delta H = H_T - H_{298}$ ), of vandenbrandeite. Temperature and enthalpy values are given in K and  $J \cdot K^{-1} \cdot mol^{-1}$  units, respectively.

| T   | $H_T - H_{298}$ | T   | $H_T - H_{298}$ | T    | $H_T - H_{298}$ |
|-----|-----------------|-----|-----------------|------|-----------------|
| 10  | -3091.8628      | 350 | 27.7294         | 690  | 123.6639        |
| 20  | -1543.8392      | 360 | 32.3851         | 700  | 125.3535        |
| 30  | -1025.2587      | 370 | 36.8530         | 710  | 127.0064        |
| 40  | -763.7700       | 380 | 41.1455         | 720  | 128.6241        |
| 50  | -605.0339       | 390 | 45.2747         | 730  | 130.2074        |
| 60  | -497.6420       | 400 | 49.2493         | 740  | 131.7570        |
| 70  | -419.5826       | 410 | 53.0795         | 750  | 133.2750        |
| 80  | -359.8683       | 420 | 56.7743         | 760  | 134.7625        |
| 90  | -312.4214       | 430 | 60.3400         | 770  | 136.2195        |
| 100 | -273.5955       | 440 | 63.7841         | 780  | 137.6479        |
| 110 | -241.0789       | 450 | 67.1127         | 790  | 139.0480        |
| 120 | -213.3345       | 460 | 70.3332         | 800  | 140.4209        |
| 130 | -189.2907       | 470 | 73.4506         | 810  | 141.7683        |
| 140 | -168.1889       | 480 | 76.4703         | 820  | 143.0899        |
| 150 | -149.4665       | 490 | 79.3972         | 830  | 144.3866        |
| 160 | -132.7046       | 500 | 82.2341         | 840  | 145.6593        |
| 170 | -117.5769       | 510 | 84.9881         | 850  | 146.9095        |
| 180 | -103.8272       | 520 | 87.6612         | 860  | 148.1368        |
| 190 | -91.2506        | 530 | 90.2572         | 870  | 149.3425        |
| 200 | -79.6881        | 540 | 92.7802         | 880  | 150.5268        |
| 210 | -69.0016        | 550 | 95.2333         | 890  | 151.6905        |
| 220 | -59.0849        | 560 | 97.6196         | 900  | 152.8342        |
| 230 | -49.8438        | 570 | 99.9416         | 910  | 153.9586        |
| 240 | -41.2019        | 580 | 102.2026        | 920  | 155.0643        |
| 250 | -33.0951        | 590 | 104.4042        | 930  | 156.1515        |
| 260 | -25.4672        | 600 | 106.5501        | 940  | 157.2211        |
| 270 | -18.2721        | 610 | 108.6414        | 950  | 158.2728        |
| 280 | -11.4668        | 620 | 110.6809        | 960  | 159.3082        |
| 290 | -5.0162         | 630 | 112.6709        | 970  | 160.3266        |
| 300 | 1.1106          | 640 | 114.6122        | 980  | 161.3292        |
| 310 | 6.9402          | 650 | 116.5080        | 990  | 162.3164        |
| 320 | 12.4958         | 660 | 118.3595        | 1000 | 163.2882        |
| 330 | 17.8010         | 670 | 120.1686        | -    | -               |
| 340 | 22.8736         | 680 | 121.9359        | -    | -               |

**Table S.7.** Calculated free-energy function,  $\Delta G$  ( $\Delta G = G_T - H_{298}$ ), of vandenbrandeite. Temperature and free-energy values are given in K and  $J \cdot K^{-1} \cdot mol^{-1}$  units, respectively.

| T   | $G_T - H_{298}$ | T   | $G_T - H_{298}$ | T    | $G_T - H_{298}$ |
|-----|-----------------|-----|-----------------|------|-----------------|
| 10  | -3092.2637      | 350 | -201.8299       | 690  | -255.0697       |
| 20  | -1546.8898      | 360 | -202.6773       | 700  | -256.8614       |
| 30  | -1033.0097      | 370 | -203.6262       | 710  | -258.6516       |
| 40  | -777.4227       | 380 | -204.6661       | 720  | -260.4389       |
| 50  | -625.3151       | 390 | -205.7888       | 730  | -262.2242       |
| 60  | -525.0679       | 400 | -206.9856       | 740  | -264.0063       |
| 70  | -454.5103       | 410 | -208.2487       | 750  | -265.7851       |
| 80  | -402.5449       | 420 | -209.5723       | 760  | -267.5604       |
| 90  | -362.9958       | 430 | -210.9499       | 770  | -269.3315       |
| 100 | -332.1524       | 440 | -212.3767       | 780  | -271.0980       |
| 110 | -307.6450       | 450 | -213.8483       | 790  | -272.8607       |
| 120 | -287.8895       | 460 | -215.3588       | 800  | -274.6186       |
| 130 | -271.7856       | 470 | -216.9045       | 810  | -276.3711       |
| 140 | -258.5440       | 480 | -218.4833       | 820  | -278.1186       |
| 150 | -247.5921       | 490 | -220.0903       | 830  | -279.8611       |
| 160 | -238.4917       | 500 | -221.7227       | 840  | -281.5978       |
| 170 | -230.9074       | 510 | -223.3781       | 850  | -283.3288       |
| 180 | -224.5813       | 520 | -225.0542       | 860  | -285.0543       |
| 190 | -219.3095       | 530 | -226.7490       | 870  | -286.7740       |
| 200 | -214.9267       | 540 | -228.4597       | 880  | -288.4875       |
| 210 | -211.3014       | 550 | -230.1854       | 890  | -290.1950       |
| 220 | -208.3236       | 560 | -231.9226       | 900  | -291.8962       |
| 230 | -205.9025       | 570 | -233.6708       | 910  | -293.5913       |
| 240 | -203.9667       | 580 | -235.4287       | 920  | -295.2799       |
| 250 | -202.4501       | 590 | -237.1948       | 930  | -296.9623       |
| 260 | -201.3024       | 600 | -238.9671       | 940  | -298.6382       |
| 270 | -200.4775       | 610 | -240.7462       | 950  | -300.3072       |
| 280 | -199.9372       | 620 | -242.5294       | 960  | -301.9701       |
| 290 | -199.6470       | 630 | -244.3157       | 970  | -303.6261       |
| 300 | -199.5821       | 640 | -246.1057       | 980  | -305.2758       |
| 310 | -199.7143       | 650 | -247.8970       | 990  | -306.9185       |
| 320 | -200.0222       | 660 | -249.6904       | 1000 | -308.5549       |
| 330 | -200.4897       | 670 | -251.4835       | -    | -               |
| 340 | -201.0972       | 680 | -253.2771       | -    | -               |

**Table S.8.** Calculated enthalpies ( $\Delta_r H$ ) and free-energies ( $\Delta_r G$ ) of reaction and associated reaction constants (Log K) of reactions (A)-(E). The values of  $\Delta_r H$  and  $\Delta_r G$  are in units of  $\text{kJ}\cdot\text{mol}^{-1}$ .

| T(K)   | $\Delta_r H$ | $\Delta_r G$ | $\text{Log } K$ | $\Delta_r H$ | $\Delta_r G$ | $\text{Log } K$ |
|--------|--------------|--------------|-----------------|--------------|--------------|-----------------|
|        | Reaction (A) |              |                 | Reaction (B) |              |                 |
| 298.15 | -46.54       | -23.92       | 4.19            | -21.65       | -10.28       | 1.80            |
| 300    | -46.26       | -23.33       | 4.06            | -21.43       | -9.90        | 1.72            |
| 320    | -43.64       | -17.35       | 2.83            | -19.31       | -6.07        | 0.99            |
| 340    | -41.58       | -11.87       | 1.82            | -17.61       | -2.62        | 0.40            |
| 360    | -39.80       | -6.62        | 0.96            | -16.17       | 0.59         | -0.09           |
| 380    | -38.84       | -2.14        | 0.29            | -15.23       | 3.34         | -0.46           |
| 400    | -38.07       | 2.21         | -0.29           | -14.47       | 5.95         | -0.78           |
| 420    | -37.64       | 6.28         | -0.78           | -13.95       | 8.34         | -1.04           |
| 440    | -37.54       | 10.10        | -1.20           | -13.65       | 10.55        | -1.25           |
| 460    | -37.74       | 13.68        | -1.55           | -13.57       | 12.59        | -1.43           |
| 480    | -38.24       | 17.06        | -1.86           | -13.69       | 14.48        | -1.58           |
| 500    | -39.03       | 20.25        | -2.12           | -14.00       | 16.22        | -1.69           |
| T(K)   | Reaction (C) |              |                 | Reaction (D) |              |                 |
| 298.15 | 40.26        | 14.08        | -2.47           | 12.13        | 26.08        | -4.57           |
| 300    | 40.37        | 14.20        | -2.47           | 11.20        | 26.36        | -4.59           |
| 320    | 41.32        | 15.27        | -2.49           | 11.95        | 29.20        | -4.77           |
| 340    | 41.94        | 16.07        | -2.47           | 12.50        | 31.87        | -4.90           |
| 360    | 42.47        | 16.84        | -2.44           | 12.96        | 34.47        | -5.00           |
| 380    | 42.34        | 17.02        | -2.34           | 13.06        | 36.76        | -5.05           |
| 400    | 42.17        | 17.24        | -2.25           | 13.12        | 39.03        | -5.10           |
| 420    | 41.77        | 17.30        | -2.15           | 13.04        | 41.20        | -5.12           |
| 440    | 41.16        | 17.23        | -2.05           | 12.85        | 43.27        | -5.14           |
| 460    | 40.33        | 17.03        | -1.93           | 12.53        | 45.27        | -5.14           |
| 480    | 39.29        | 16.73        | -1.82           | 12.09        | 47.18        | -5.13           |
| 500    | 38.03        | 16.33        | -1.71           | 11.53        | 49.03        | -5.12           |
| T(K)   | Reaction (E) |              |                 | Reaction (F) |              |                 |
| 298.15 | -8.82        | -9.46        | 1.66            | -127.11      | -114.749     | 20.10           |
| 300    | -8.97        | -9.60        | 1.67            | -127.10      | -114.50      | 19.94           |
| 320    | -10.32       | -10.88       | 1.78            | -126.97      | -111.90      | 18.27           |
| 340    | -11.50       | -11.98       | 1.84            | -126.96      | -109.37      | 16.80           |
| 360    | -12.53       | -12.92       | 1.87            | -127.06      | -106.94      | 15.52           |
| 380    | -13.45       | -13.75       | 1.89            | -127.28      | -104.60      | 14.38           |
| 400    | -14.24       | -14.43       | 1.88            | -127.60      | -102.36      | 13.37           |
| 420    | -14.92       | -15.00       | 1.87            | -128.02      | -100.21      | 12.46           |
| 440    | -15.50       | -15.47       | 1.84            | -128.54      | -98.13       | 11.65           |
| 460    | -15.99       | -15.83       | 1.80            | -129.13      | -96.12       | 10.91           |
| 480    | -16.40       | -16.11       | 1.75            | -129.82      | -94.17       | 10.25           |
| 500    | -16.74       | -16.30       | 1.70            | -130.61      | -92.27       | 9.64            |

**Figure S.4.** The atomic motions associated to some Raman active vibrational normal modes of vandenbrandeite. Color code: U-blue; Cu-pink-orange; O-red; H-white.

- Mode  $\nu = 3331 \text{ cm}^{-1}$  –  $\nu(OH)$  –  $OH$  bond stretching vibrations.

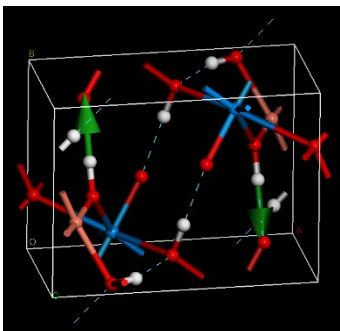

- Mode  $\nu = 3146 \text{ cm}^{-1}$  –  $\nu(OH)$  –  $OH$  bond stretching vibrations.

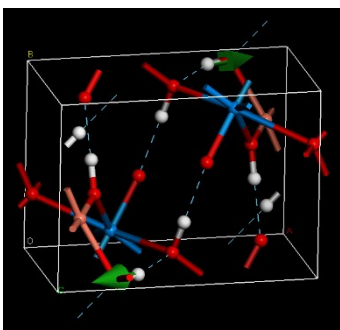

- Mode  $\nu = 1224 \text{ cm}^{-1}$  –  $\delta(UOH)$  –  $UOH$  bending vibrations.

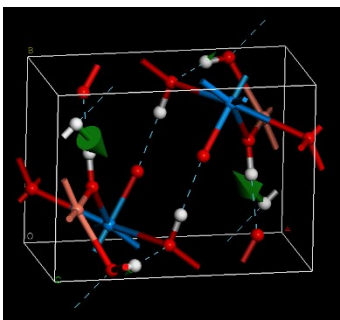

- Mode  $\nu = 1014 \text{ cm}^{-1}$  –  $\delta(UOH)$  –  $UOH$  bending vibrations.

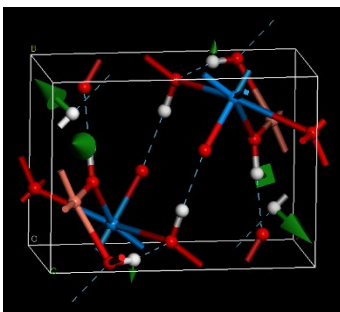

- Mode  $\nu = 894 \text{ cm}^{-1}$  –  $\delta(UOH)$  –  $UOH$  bending vibrations.

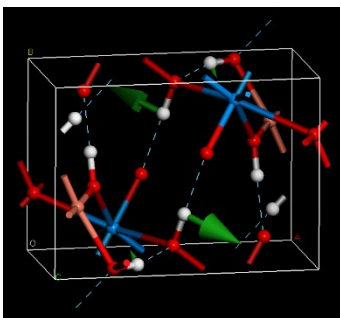

- Mode  $\nu = 834 \text{ cm}^{-1}$  –  $\nu^a(UO_2^{2+}) + \delta(UOH)$  – Uranyl antisymmetric stretching and  $UOH$  bending vibrations.

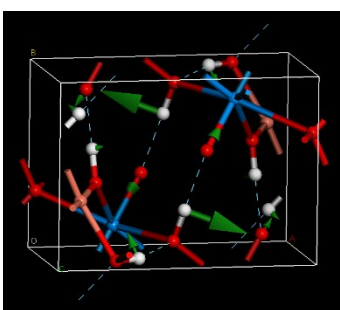

- Mode  $\nu = 772 \text{ cm}^{-1}$  –  $\nu^s(UO_2^{2+}) + \delta(UOH)$  – Uranyl symmetric stretching and  $UOH$  bending vibrations.

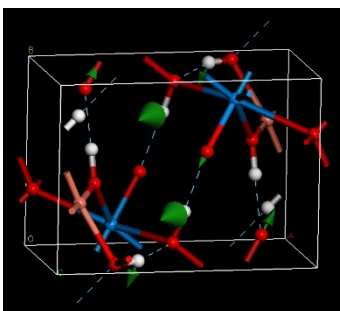

- Mode  $\nu = 631 \text{ cm}^{-1}$  –  $\delta(UOH)$  –  $UOH$  bending vibrations.

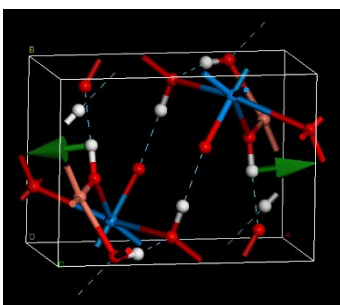

- Mode  $\nu = 516 \text{ cm}^{-1}$  –  $\nu(\text{CuO}) + \delta(\text{UOH}) - \text{CuO}$  bond stretching and  $\text{UOH}$  bending vibrations.

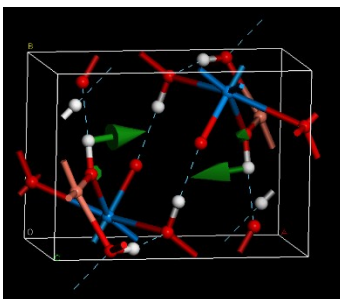

- Mode  $\nu = 474 \text{ cm}^{-1}$  –  $\delta(\text{UOCu}) + \delta(\text{UOH}) - \text{UOCu}$  and  $\text{UOH}$  bending vibrations.

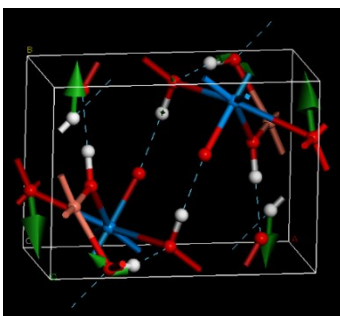

- Mode  $\nu = 440 \text{ cm}^{-1}$  –  $\delta(\text{UOCu}) + T(\text{OH}) - \text{UOCu}$  bending and hydroxyl translations.

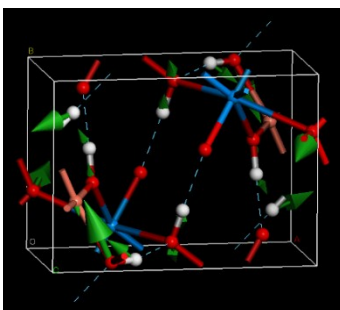

- Mode  $\nu = 394 \text{ cm}^{-1}$  –  $\nu(\text{OH}) + \delta(\text{UOH}) - \text{OH}$  bond stretching and  $\text{UOH}$  bending vibrations.

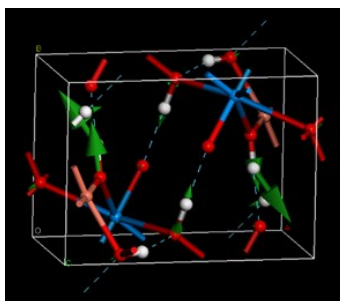

- Mode  $\nu = 348 \text{ cm}^{-1}$  –  $\nu(UO_{eq}) + T(OH)$  – Equatorial  $UO$  bond stretching and hydroxyl translations.

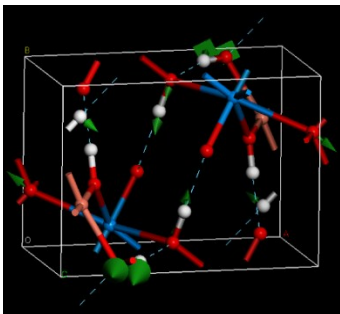

- Mode  $\nu = 271 \text{ cm}^{-1}$  –  $\gamma(UO_2^{2+}) + \delta(UOCu) + T(OH)$  – Uranyl deformation,  $UOCu$  bending and hydroxyl translations.

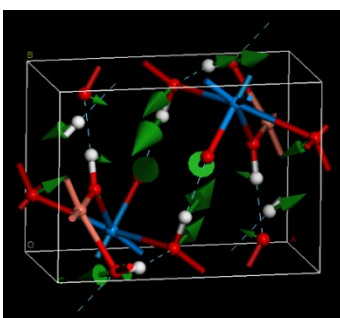

- Mode  $\nu = 249 \text{ cm}^{-1}$  –  $\delta(UO_2^{2+}) + \delta(UOH)$  – Uranyl bending and  $UOH$  bending vibrations.

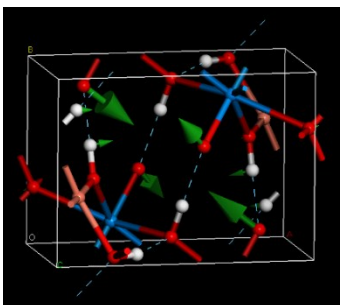

- Mode  $\nu = 232 \text{ cm}^{-1}$  –  $\gamma(UO_2^{2+}) + \delta(UOCu) + \delta(UOH)$  – Uranyl deformation,  $UOCu$  and  $UOH$  bending vibrations.

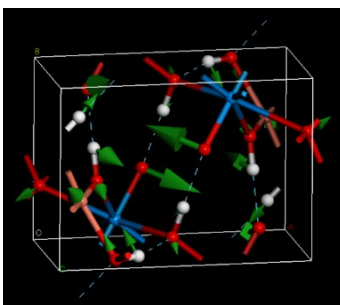

- Mode  $\nu = 213 \text{ cm}^{-1}$  –  $\gamma(\text{UO}_2^{2+}) + T(\text{OH})$  – Uranyl deformation and hydroxyl translations.

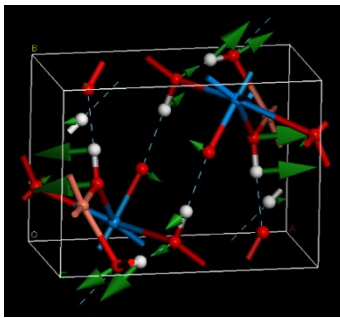

- Mode  $\nu = 171 \text{ cm}^{-1}$  –  $T(\text{Cu}) + \rho(\text{UO}_2^{2+}) + \delta(\text{UOCu}) + \delta(\text{UOH})$  – Copper translation, uranyl rocking,  $\text{UOCu}$  and  $\text{UOH}$  bending vibrations.

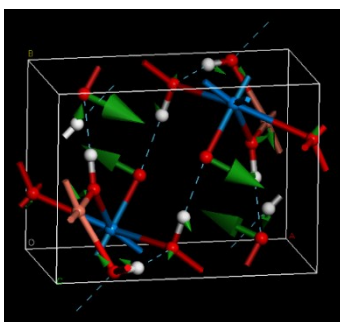

- Mode  $\nu = 72 \text{ cm}^{-1}$  –  $T(\text{Cu}) + T(\text{UO}_2^{2+}) + \delta(\text{UOCu}) + \delta(\text{UOH})$  – Copper and uranyl translations,  $\text{UOCu}$  and  $\text{UOH}$  bending vibrations.

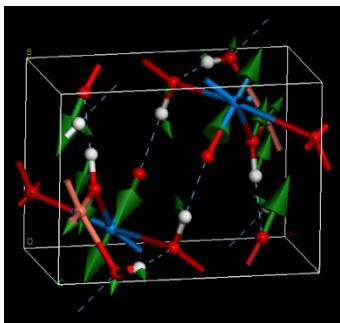



**Figure S.5.** Resolution of some composite bands in the experimental Raman spectrum of vandenbrandeite mineral into single band contributions: (A) Band  $\beta$ ; (B) Bands  $\delta$  and  $\varepsilon$ .

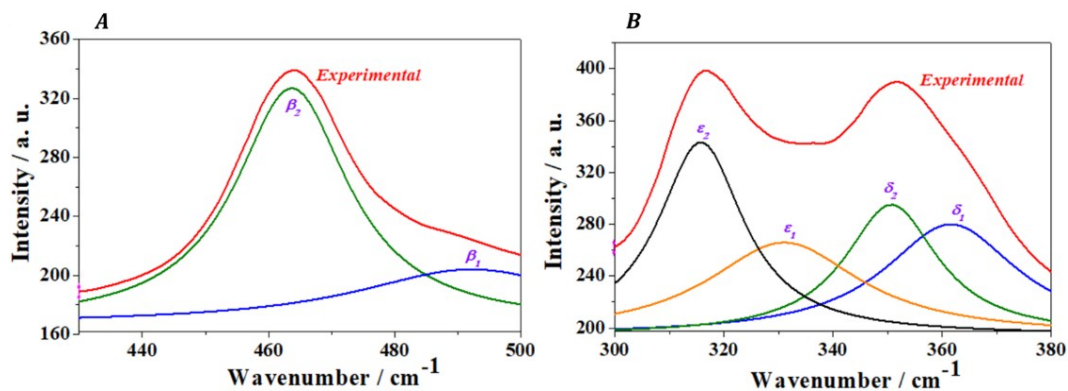

**Figure S.6.** Calculated free energies of formation and associated reaction constants of vandenbrandeite as a function of temperature.

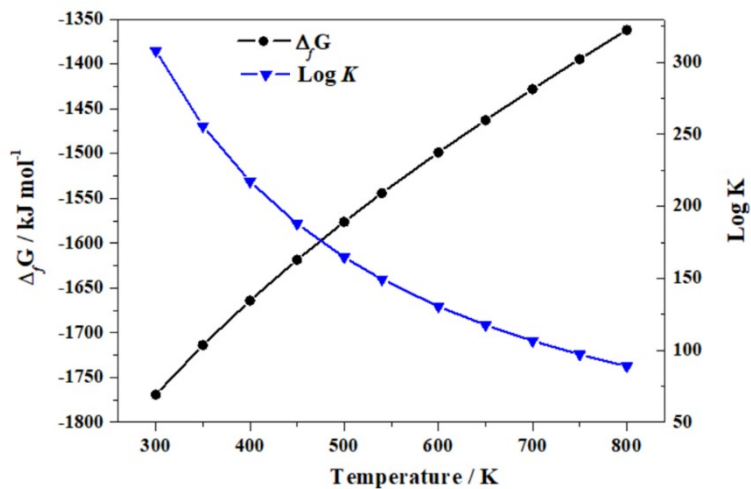

Supplement: c9ra09047a1.pdf [file c9ra09047a1.pdf]
